# Supplementary material
Source: PubMed Central journal article supplement (PMC4243539)
Supplement: NIHMS634670-supplement-1.pdf [file NIHMS634670-supplement-1.pdf]

## Supplementary Figures and Tables

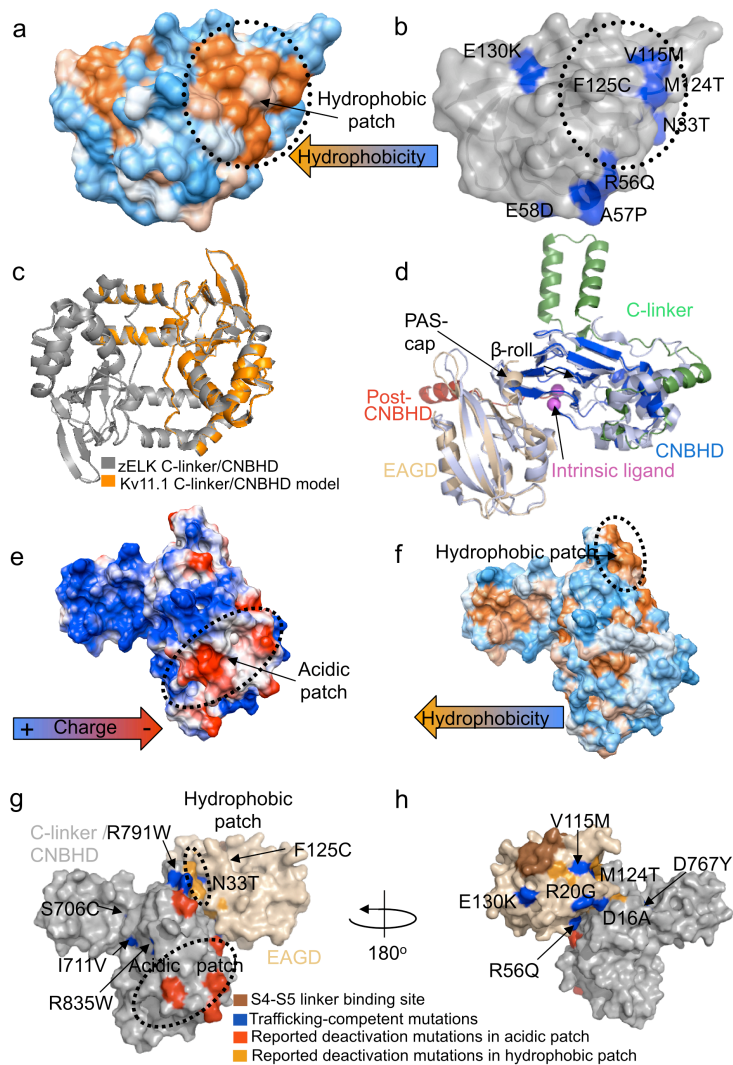

Supplementary Figure 1. Properties of C-linker/CNBHD mutations. (a) Hydrophobic surface representation of the Kv11.1 PASD (PDB: 1BYW) rendered in UCSF Chimera. Residue colors range from blue (low hydrophobicity) to orange (high hydrophobicity). The hydrophobic patch important for deactivation is circled. (b) PASD (PDB: 1BYW) shown in the same orientation as (a) with trafficking-competent mutations highlighted in blue except for F125C, which is buried. (c) Our Kv11.1 C-linker/CNBHD model monomer (orange) aligned with the zELK crystal structure dimer (PDB: 3UKN) (gray). (d) Representation of the Kv11.1 EAGD (PDB: 4HP9) complexed with our Kv11.1 C-linker/ CNBHD model aligned to the EAGD-CNBHD complex from mouse (PDB: 4LLO). The Kv11.1 model is colored wheat (EAGD), green (C-linker), and blue (CNBHD), compared to mouse complex (PDB: 4LLO) in light blue. The intrinsic ligand is in magenta and a short post-CNBHD region is in red. (e) Electrostatic and (f) hydrophobic surface representations of the Kv11.1 C-linker/CNBHD model in same orientation as (c) rendered in UCSF Chimera. Residue colors for (e) range from blue (positive) to red (negative). The acidic and hydrophobic patches important for deactivation are circled. (g) Surface representation of our C-linker/CNBHD model in same orientation as (c) with EAGD showing the location of previously reported deactivation lysine mutants in acidic patch (D843, E847, D850, E857, D864) and near the hydrophobic patches (V794, V795, V796, V797, I798, L825)<sup>33</sup>. Trafficking-competent mutations from this study are colored blue. (h) Same as (g) but rotated 180° and showing residues 88-94 (brown) reported to interact with the S4-S5 linker<sup>29</sup>.

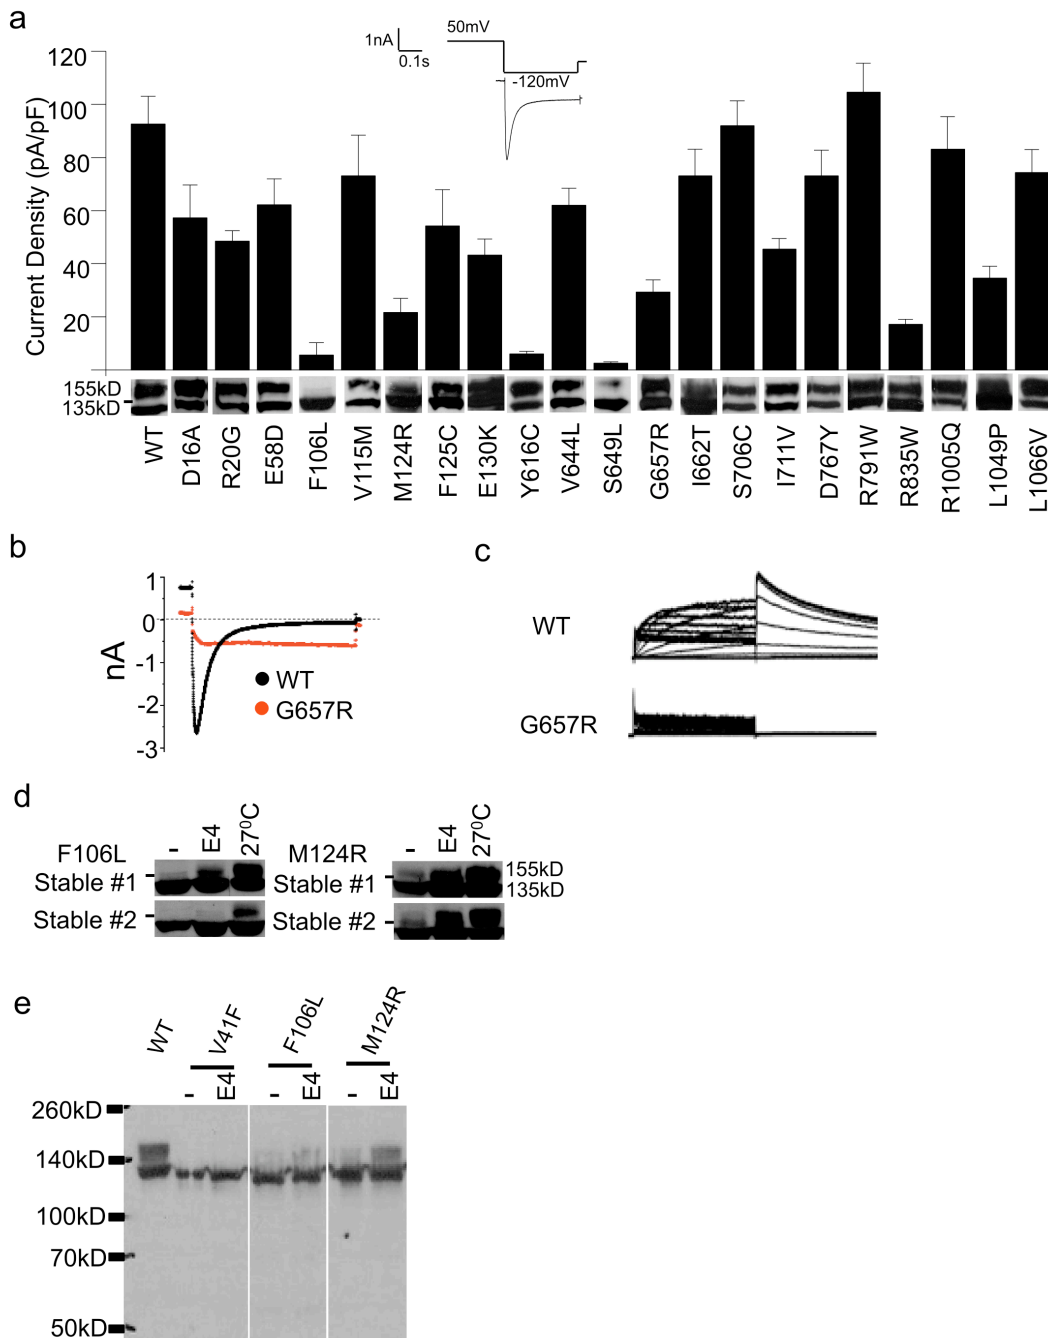

Supplemental Figure 2. Properties of HEK cell lines stably expressing Kv11.1. (a)  $I_{Kv11.1}$  peak densities and representative immunoblots (140kD molecular weight marker shown) for each of the mutations functionally characterized. From a holding potential of -80mV, cells were depolarized to 50mV and inward current was measured after a step to -120mV. (b) Representative  $I_{Kv11.1}$  trace comparing WT with G657R. (c) Representative  $I_{Kv11.1}$  traces using the activation protocol (see Fig. 3) comparing WT with G657R. (d) Immunoblots (140kD molecular weight marker shown) showing the trafficking phenotypes for two different F106L and M124 stable cell lines cultured under control conditions or at 27°C or in 10mM E4031. (e) An example of an uncropped Immunoblot showing the trafficking phenotype of transiently transfected WT, V41F, F106L and M124R cultured under control conditions (-) or in 10mM E4031 (E4).

Supplementary Table 1. Kv11.1 missense mutations

| Variant | Location | Type | SIFT          | SNP&Go       | KvSNP           | Reference                                                         |
|---------|----------|------|---------------|--------------|-----------------|-------------------------------------------------------------------|
| D16A    | EAGD     | LQT2 | Not Tolerated | Disease (8)  | Disease (0.546) | Kapplinger JD et al. Heart Rhythm 2009;5(9):1297-1303             |
| R20G    | EAGD     | LQT2 | Not Tolerated | Disease (8)  | Disease (0.602) | Kapplinger JD et al. Heart Rhythm 2009;5(9):1297-1303             |
| S26I    | PASD     | LQT2 | Not Tolerated | Disease (6)  | Benign (0.488)  | Inherited Arrhythmias Database                                    |
| K28E    | PASD     | LQT2 | Not Tolerated | Disease (8)  | Disease (0.749) | Inherited Arrhythmias Database                                    |
| F29L    | PASD     | LQT2 | Not Tolerated | Disease (8)  | Disease (0.932) | Inherited Arrhythmias Database                                    |
| I30T    | PASD     | LQT2 | Not Tolerated | Disease (7)  | Benign (0.265)  | Kapplinger JD et al. Heart Rhythm 2009;5(9):1297-1303             |
| I31S    | PASD     | LQT2 | Not Tolerated | Disease (9)  | Disease (0.914) | Inherited Arrhythmias Database                                    |
| A32T    | PASD     | LQT2 | Not Tolerated | Disease (8)  | Disease (0.757) | Kapplinger JD et al. Heart Rhythm 2009;5(9):1297-1303             |
| N33T    | PASD     | LQT2 | Not Tolerated | Disease (9)  | Disease (0.956) | Inherited Arrhythmias Database                                    |
| V41F    | PASD     | LQT2 | Not Tolerated | Disease (9)  | Disease (0.819) | Kapplinger JD et al. Heart Rhythm 2009;5(9):1297-1303             |
| I42N    | PASD     | LQT2 | Not Tolerated | Disease (9)  | Disease (1)     | Chung SK et al. Heart Rhythm 2007;4(10):1306-1314                 |
| Y43C    | PASD     | LQT2 | Not Tolerated | Disease (9)  | Disease (1)     | Inherited Arrhythmias Database                                    |
| C44F    | PASD     | LQT2 | Not Tolerated | Disease (10) | Disease (1)     | Inherited Arrhythmias Database                                    |
| N45Y    | PASD     | LQT2 | Not Tolerated | Disease (9)  | Disease (0.902) | Kapplinger JD et al. Heart Rhythm 2009;5(9):1297-1303             |
| G47V    | PASD     | LQT2 | Not Tolerated | Disease (10) | Disease (0.899) | Inherited Arrhythmias Database                                    |
| C49Y    | PASD     | LQT2 | Not Tolerated | Disease (10) | Disease (0.944) | Inherited Arrhythmias Database                                    |
| G53D    | PASD     | LQT2 | Not Tolerated | Disease (10) | Disease (1)     | Kapplinger JD et al. Heart Rhythm 2009;5(9):1297-1303             |
| G53R    | PASD     | LQT2 | Not Tolerated | Disease (10) | Disease (1)     | Inherited Arrhythmias Database                                    |
| Y54H    | PASD     | LQT2 | Not Tolerated | Disease (8)  | Benign (0.427)  | Kapplinger JD et al. Heart Rhythm 2009;5(9):1297-1303             |
| S55L    | PASD     | LQT2 | Not Tolerated | Disease (6)  | Disease (0.888) | Inherited Arrhythmias Database                                    |
| R56Q    | PASD     | LQT2 | Not Tolerated | Disease (9)  | Disease (0.784) | Inherited Arrhythmias Database                                    |
| A57P    | PASD     | LQT2 | Tolerated     | Disease (8)  | Benign (0.305)  | Kapplinger JD et al. Heart Rhythm 2009;5(9):1297-1303             |
| E58A    | PASD     | LQT2 | Not Tolerated | Disease (8)  | Disease (1)     | Inherited Arrhythmias Database                                    |
| E58D    | PASD     | LQT2 | Tolerated     | Disease (7)  | Benign (0.306)  | Inherited Arrhythmias Database                                    |
| E58G    | PASD     | LQT2 | Not Tolerated | Disease (8)  | Disease (1)     | Inherited Arrhythmias Database                                    |
| E58K    | PASD     | LQT2 | Not Tolerated | Disease (9)  | Disease (0.63)  | Inherited Arrhythmias Database                                    |
| C64W    | PASD     | LQT2 | Not Tolerated | Disease (9)  | Benign (0.496)  | Kapplinger JD et al. Heart Rhythm 2009;5(9):1297-1303             |
| C64Y    | PASD     | LQT2 | Not Tolerated | Disease (9)  | Disease (0.512) | Inherited Arrhythmias Database                                    |
| T65P    | PASD     | LQT2 | Tolerated     | Disease (7)  | Disease (1)     | Inherited Arrhythmias Database                                    |
| C66G    | PASD     | LQT2 | Not Tolerated | Disease (9)  | Disease (0.924) | Inherited Arrhythmias Database                                    |
| F68L    | PASD     | LQT2 | Not Tolerated | Disease (8)  | Disease (0.944) | Inherited Arrhythmias Database                                    |
| H70N    | PASD     | LQT2 | Tolerated     | Disease (4)  | Disease (0.862) | Kapplinger JD et al. Heart Rhythm 2009;5(9):1297-1303             |
| H70R    | PASD     | LQT2 | Tolerated     | Disease (5)  | Disease (0.704) | Inherited Arrhythmias Database                                    |
| G71R    | PASD     | LQT2 | Not Tolerated | Disease (8)  | Disease (1)     | Inherited Arrhythmias Database                                    |
| P72L    | PASD     | LQT2 | Not Tolerated | Disease (4)  | Disease (0.954) | Kapplinger JD et al. Heart Rhythm 2009;5(9):1297-1303             |
| P72Q    | PASD     | LQT2 | Tolerated     | Disease (2)  | Disease (0.839) | Inherited Arrhythmias Database                                    |
| T74M    | PASD     | LQT2 | Not Tolerated | Disease (7)  | Disease (1)     | Inherited Arrhythmias Database                                    |
| T74P    | PASD     | LQT2 | Not Tolerated | Disease (8)  | Disease (1)     | Kapplinger JD et al. Heart Rhythm 2009;5(9):1297-1303             |
| T74R    | PASD     | LQT2 | Not Tolerated | Disease (9)  | Disease (1)     | Kapplinger JD et al. Heart Rhythm 2009;5(9):1297-1303             |
| A78P    | PASD     | LQT2 | Not Tolerated | Disease (6)  | Disease (0.826) | Inherited Arrhythmias Database                                    |
| A80P    | PASD     | LQT2 | Tolerated     | Disease (6)  | Disease (0.838) | Grilo LS et al. Ann Noninvasive Electrocardiol 2001;16(2):213-218 |
| A85V    | PASD     | LQT2 | Tolerated     | Disease (6)  | Disease (0.742) | Inherited Arrhythmias Database                                    |
| L86P    | PASD     | LQT2 | Not Tolerated | Disease (9)  | Disease (0.831) | Kapplinger JD et al. Heart Rhythm 2009;5(9):1297-1303             |
| L86R    | PASD     | LQT2 | Not Tolerated | Disease (8)  | Disease (1)     | Inherited Arrhythmias Database                                    |
| L87P    | PASD     | LQT2 | Tolerated     | Disease (8)  | Disease (0.903) | Inherited Arrhythmias Database                                    |
| V94G    | PASD     | LQT2 | Not Tolerated | Disease (7)  | Disease (0.918) | Kapplinger JD et al. Heart Rhythm 2009;5(9):1297-1303             |
| I96T    | PASD     | LQT2 | Not Tolerated | Disease (8)  | Disease (0.797) | Inherited Arrhythmias Database                                    |
| I96V    | PASD     | LQT2 | Tolerated     | Disease (0)  | Benign (0.35)   | Kapplinger JD et al. Heart Rhythm 2009;5(9):1297-1303             |
| F98S    | PASD     | LQT2 | Not Tolerated | Disease (9)  | Benign (0.307)  | Tan HL et al. Circulation 2006;114(20):2096-2103                  |
| Y99S    | PASD     | LQT2 | Not Tolerated | Disease (10) | Disease (0.867) | Inherited Arrhythmias Database                                    |
| R100G   | PASD     | LQT2 | Tolerated     | Disease (9)  | Disease (0.737) | Inherited Arrhythmias Database                                    |
| R100Q   | PASD     | LQT2 | Tolerated     | Disease (8)  | Disease (0.849) | Inherited Arrhythmias Database                                    |
| R100W   | PASD     | LQT2 | Not Tolerated | Disease (9)  | Disease (0.768) | Kapplinger JD et al. Heart Rhythm 2009;5(9):1297-1303             |
| K101E   | PASD     | SIDS | Not Tolerated | Disease (10) | Disease (0.889) | Inherited Arrhythmias Database                                    |
| D102A   | PASD     | LQT2 | Tolerated     | Disease (8)  | Disease (0.827) | Kapplinger JD et al. Heart Rhythm 2009;5(9):1297-1303             |
| F106L   | PASD     | LQT2 | Tolerated     | Disease (7)  | Disease (0.784) | Tan HL et al. Circulation 2006;114(20):2096-2103                  |
| F106Y   | PASD     | LQT2 | Not Tolerated | Disease (9)  | Benign (0.132)  | Kapplinger JD et al. Heart Rhythm 2009;5(9):1297-1303             |
| C108R   | PASD     | LQT2 | Not Tolerated | Disease (10) | Benign (0.439)  | Kapplinger JD et al. Heart Rhythm 2009;5(9):1297-1303             |
| P114S   | PASD     | LQT2 | Not Tolerated | Disease (9)  | Disease (0.999) | Inherited Arrhythmias Database                                    |
| M124R   | PASD     | LQT2 | Tolerated     | Disease (9)  | Benign (0.425)  | Inherited Arrhythmias Database                                    |
| M124T   | PASD     | LQT2 | Not Tolerated | Disease (9)  | Disease (0.652) | Inherited Arrhythmias Database                                    |
| F125C   | PASD     | LQT2 | Tolerated     | Disease (9)  | Benign (0.444)  | Kapplinger JD et al. Heart Rhythm 2009;5(9):1297-1303             |
| E130K   | PASD     | LQT2 | Tolerated     | Disease (4)  | Benign (0.329)  | Thu-Thuy LT et al. Jpn Heart J 2004;45(2):243-250                 |
| P141L   | N-linker | LQT2 | Tolerated     | Disease (5)  | Benign (0.409)  | Kapplinger JD et al. Heart Rhythm 2009;5(9):1297-1303             |
| R148W   | N-linker | SNP  | Not Tolerated | Disease (4)  | Disease (0.796) | Kapplinger JD et al. Heart Rhythm 2009;5(9):1297-1303             |
| R164H   | N-linker | LQT2 | Tolerated     | Disease (5)  | Disease (0.608) | Kapplinger JD et al. Heart Rhythm 2009;5(9):1297-1303             |
| R176W   | N-linker | SNP  | Not Tolerated | Disease (7)  | Disease (0.799) | Inherited Arrhythmias Database                                    |
| R181Q   | N-linker | SNP  | Tolerated     | Disease (2)  | Benign (0.11)   | Inherited Arrhythmias Database                                    |

Supplementary Table 1. Kv11.1 missense mutations

|       |          |      |               |              |                 |                                                              |
|-------|----------|------|---------------|--------------|-----------------|--------------------------------------------------------------|
| G187S | N-linker | SNP  | Tolerated     | Disease (4)  | Benign (0.085)  | Inherited Arrhythmias Database                               |
| A190T | N-linker | SNP  | Tolerated     | Disease (2)  | Benign (0.019)  | Inherited Arrhythmias Database                               |
| A203T | N-linker | SNP  | Tolerated     | Disease (1)  | Benign (0.098)  | Inherited Arrhythmias Database                               |
| V215G | N-linker | SNP  | Not Tolerated | Disease (6)  | Benign (0.219)  | Inherited Arrhythmias Database                               |
| M218V | N-linker | LQT2 | Tolerated     | Disease (3)  | Disease (0.625) | Kapplinger JD et al. Heart Rhythm 2009;5(9):1297-1303        |
| G238S | N-linker | LQT2 | Tolerated     | Disease (0)  | Benign (0.464)  | Inherited Arrhythmias Database                               |
| R242G | N-linker | LQT2 | Tolerated     | Neutral (1)  | Disease (0.631) | Kapplinger JD et al. Heart Rhythm 2009;5(9):1297-1303        |
| P251A | N-linker | SNP  | Tolerated     | Neutral (2)  | Benign (0.45)   | Inherited Arrhythmias Database                               |
| P251S | N-linker | LQT2 | Tolerated     | Neutral (1)  | Disease (0.8)   | Inherited Arrhythmias Database                               |
| R252G | N-linker | LQT2 | Tolerated     | Disease (2)  | Disease (0.607) | Tan HL et al. Circulation 2006;114(20):2096-2103             |
| H254Q | N-linker | SNP  | Tolerated     | Neutral (2)  | Benign (0.296)  | Inherited Arrhythmias Database                               |
| N257H | N-linker | SNP  | Tolerated     | Neutral (1)  | Benign (0.268)  | Inherited Arrhythmias Database                               |
| D259N | N-linker | LQT2 | Tolerated     | Neutral (1)  | Disease (0.613) | Kapplinger JD et al. Heart Rhythm 2009;5(9):1297-1303        |
| R273Q | N-linker | SIDS | Tolerated     | Disease (5)  | Disease (0.874) | Inherited Arrhythmias Database                               |
| A277D | N-linker | LQT2 | Tolerated     | Disease (5)  | Disease (0.68)  | Kapplinger JD et al. Heart Rhythm 2009;5(9):1297-1303        |
| V279M | N-linker | SIDS | Tolerated     | Neutral (3)  | Disease (0.839) | Inherited Arrhythmias Database                               |
| M291T | N-linker | LQT2 | Tolerated     | Disease (4)  | Disease (0.877) | Kapplinger JD et al. Heart Rhythm 2009;5(9):1297-1303        |
| G294V | N-linker | SIDS | Tolerated     | Disease (4)  | Disease (0.708) | Tester DJ et al. Cardiovasc Res 2005;67:388-396.             |
| P297S | N-linker | LQT2 | Tolerated     | Disease (4)  | Disease (0.721) | Kapa S et al. Circulation 2009;120:1752-1760                 |
| R301L | N-linker | LQT2 | Tolerated     | Disease (6)  | Disease (0.794) | Kapplinger JD et al. Heart Rhythm 2009;5(9):1297-1303        |
| G306W | N-linker | LQT2 | Not Tolerated | Disease (4)  | Disease (0.631) | Inherited Arrhythmias Database                               |
| R312C | N-linker | LQT2 | Not Tolerated | Disease (5)  | Disease (0.893) | Inherited Arrhythmias Database                               |
| G314S | N-linker | LQT2 | Tolerated     | Neutral (8)  | Benign (0.362)  | Kapplinger JD et al. Heart Rhythm 2009;5(9):1297-1303        |
| S320L | N-linker | LQT2 | Not Tolerated | Disease (7)  | Disease (1)     | Inherited Arrhythmias Database                               |
| D323N | N-linker | LQT2 | Tolerated     | Disease (2)  | Benign (0.379)  | Kapplinger JD et al. Heart Rhythm 2009;5(9):1297-1303        |
| R328C | N-linker | LQT2 | Not Tolerated | Disease (8)  | Benign (0.445)  | Inherited Arrhythmias Database                               |
| P334L | N-linker | LQT2 | Tolerated     | Disease (9)  | Disease (0.51)  | Inherited Arrhythmias Database                               |
| D342V | N-linker | LQT2 | Tolerated     | Disease (8)  | Disease (0.734) | Itoh H et al. Circ Arrhythm Electrophysiol 2009;2:511-523    |
| P347S | N-linker | SNP  | Tolerated     | Disease (2)  | Benign (0.258)  | Inherited Arrhythmias Database                               |
| T367S | N-linker | SNP  | Tolerated     | Disease (1)  | Benign (0.336)  | Inherited Arrhythmias Database                               |
| I400N | N-linker | LQT2 | Not Tolerated | Disease (10) | Disease (1)     | Inherited Arrhythmias Database                               |
| H402R | N-linker | LQT2 | Not Tolerated | Disease (10) | Disease (0.956) | Kapplinger JD et al. Heart Rhythm 2009;5(9):1297-1303        |
| W410S | S1       | LQT2 | Not Tolerated | Disease (10) | Disease (0.957) | Inherited Arrhythmias Database                               |
| L413P | S1       | LQT2 | Not Tolerated | Disease (10) | Benign (0.298)  | Inherited Arrhythmias Database                               |
| Y420C | S1       | LQT2 | Not Tolerated | Disease (9)  | Disease (1)     | Inherited Arrhythmias Database                               |
| T421M | S1       | LQT2 | Not Tolerated | Disease (9)  | Disease (0.78)  | Inherited Arrhythmias Database                               |
| A422T | S1       | LQT2 | Not Tolerated | Disease (9)  | Disease (0.99)  | Inherited Arrhythmias Database                               |
| P426H | S1/S2    | LQT2 | Not Tolerated | Disease (9)  | Disease (0.787) | Inherited Arrhythmias Database                               |
| Y427C | S1/S2    | LQT2 | Not Tolerated | Disease (9)  | Disease (1)     | Kapplinger JD et al. Heart Rhythm 2009;5(9):1297-1303        |
| Y427H | S1/S2    | LQT2 | Not Tolerated | Disease (9)  | Disease (1)     | Inherited Arrhythmias Database                               |
| Y427S | S1/S2    | LQT2 | Not Tolerated | Disease (9)  | Disease (0.924) | Inherited Arrhythmias Database                               |
| S428L | S1/S2    | LQT2 | Tolerated     | Disease (9)  | Disease (1)     | Inherited Arrhythmias Database                               |
| F431L | S1/S2    | LQT2 | Not Tolerated | Disease (10) | Disease (0.929) | Kapplinger JD et al. Heart Rhythm 2009;5(9):1297-1303        |
| T436M | S1/S2    | LQT2 | Tolerated     | Disease (0)  | Disease (0.674) | Inherited Arrhythmias Database                               |
| P440L | S1/S2    | LQT2 | Tolerated     | Disease (3)  | Benign (0.338)  | Kapplinger JD et al. Heart Rhythm 2009;5(9):1297-1303        |
| E444D | S1/S2    | LQT2 | Tolerated     | Neutral (2)  | Disease (0.539) | Inherited Arrhythmias Database                               |
| P451L | S1/S2    | LQT2 | Not Tolerated | Disease (9)  | Disease (0.953) | Inherited Arrhythmias Database                               |
| D456Y | S2       | LQT2 | Not Tolerated | Disease (9)  | Disease (1)     | Inherited Arrhythmias Database                               |
| D460Y | S2       | LQT2 | Not Tolerated | Disease (10) | Disease (1)     | Inherited Arrhythmias Database                               |
| F463L | S2       | LQT2 | Not Tolerated | Disease (9)  | Disease (0.931) | Yang HT et al. Clin Exp Pharmacol Physiol 2009;36(8):822-827 |
| D466Y | S2       | LQT2 | Not Tolerated | Disease (10) | Disease (0.999) | Kapplinger JD et al. Heart Rhythm 2009;5(9):1297-1303        |
| N470D | S2       | LQT2 | Not Tolerated | Disease (10) | Disease (0.999) | Inherited Arrhythmias Database                               |
| T473N | S2/S3    | LQT2 | Not Tolerated | Disease (10) | Disease (0.999) | Kapplinger JD et al. Heart Rhythm 2009;5(9):1297-1303        |
| T474I | S2/S3    | LQT2 | Not Tolerated | Disease (10) | Disease (0.999) | Inherited Arrhythmias Database                               |
| Y475C | S2/S3    | LQT2 | Not Tolerated | Disease (9)  | Disease (1)     | Inherited Arrhythmias Database                               |
| V476I | S2/S3    | LQT2 | Tolerated     | Disease (3)  | Disease (0.817) | Kapplinger JD et al. Heart Rhythm 2009;5(9):1297-1303        |
| A490T | S2/S3    | LQT2 | Not Tolerated | Disease (9)  | Benign (0.265)  | Inherited Arrhythmias Database                               |
| H492Y | S2/S3    | LQT2 | Not Tolerated | Disease (10) | Disease (1)     | Itoh H et al. Circ Arrhythm Electrophysiol 2009;2:511-523    |
| Y493C | S3       | LQT2 | Not Tolerated | Disease (9)  | Disease (1)     | Inherited Arrhythmias Database                               |
| Y493S | S3       | LQT2 | Not Tolerated | Disease (10) | Disease (0.924) | Kapplinger JD et al. Heart Rhythm 2009;5(9):1297-1303        |
| D501H | S3       | LQT2 | Not Tolerated | Disease (10) | Disease (0.775) | Inherited Arrhythmias Database                               |
| D501N | S3       | LQT2 | Not Tolerated | Disease (10) | Disease (0.835) | Inherited Arrhythmias Database                               |
| K525N | S4       | LQT2 | Not Tolerated | Disease (9)  | Benign (0.4)    | Inherited Arrhythmias Database                               |
| R528P | S4       | LQT2 | Not Tolerated | Disease (10) | Benign (0.225)  | Inherited Arrhythmias Database                               |
| R531Q | S4       | LQT2 | Not Tolerated | Disease (9)  | Disease (1)     | Inherited Arrhythmias Database                               |
| R531W | S4       | LQT2 | Not Tolerated | Disease (10) | Disease (0.909) | Kapplinger JD et al. Heart Rhythm 2009;5(9):1297-1303        |
| R534C | S4       | LQT2 | Not Tolerated | Disease (10) | Disease (0.856) | Inherited Arrhythmias Database                               |
| R534L | S4       | LQT2 | Not Tolerated | Disease (10) | Disease (0.906) | Inherited Arrhythmias Database                               |
| L552S | S5       | LQT2 | Not Tolerated | Disease (9)  | Disease (0.999) | Inherited Arrhythmias Database                               |

Supplementary Table 1. Kv11.1 missense mutations

|       |            |      |               |              |                 |                                                       |
|-------|------------|------|---------------|--------------|-----------------|-------------------------------------------------------|
| A558E | S5         | LQT2 | Not Tolerated | Disease (9)  | Disease (0.999) | Kapplinger JD et al. Heart Rhythm 2009;5(9):1297-1303 |
| A558P | S5         | LQT2 | Not Tolerated | Disease (9)  | Disease (0.999) | Inherited Arrhythmias Database                        |
| L559H | S5         | LQT2 | Not Tolerated | Disease (9)  | Disease (0.999) | Inherited Arrhythmias Database                        |
| A561P | S5         | LQT2 | Not Tolerated | Disease (10) | Disease (0.999) | Inherited Arrhythmias Database                        |
| A561T | S5         | LQT2 | Not Tolerated | Disease (9)  | Disease (0.999) | Inherited Arrhythmias Database                        |
| A561V | S5         | LQT2 | Not Tolerated | Disease (9)  | Disease (0.954) | Inherited Arrhythmias Database                        |
| H562P | S5         | LQT2 | Not Tolerated | Disease (10) | Disease (0.999) | Inherited Arrhythmias Database                        |
| H562R | S5         | LQT2 | Not Tolerated | Disease (10) | Disease (0.999) | Kapplinger JD et al. Heart Rhythm 2009;5(9):1297-1303 |
| L564P | S5         | LQT2 | Not Tolerated | Disease (10) | Disease (0.955) | Inherited Arrhythmias Database                        |
| A565T | S5         | LQT2 | Not Tolerated | Disease (10) | Disease (0.999) | Kapplinger JD et al. Heart Rhythm 2009;5(9):1297-1303 |
| C566S | S5         | LQT2 | Not Tolerated | Disease (10) | Disease (0.999) | Inherited Arrhythmias Database                        |
| W568C | S5         | LQT2 | Not Tolerated | Disease (10) | Disease (1)     | Inherited Arrhythmias Database                        |
| W568R | S5         | LQT2 | Not Tolerated | Disease (10) | Disease (1)     | Inherited Arrhythmias Database                        |
| Y569H | S5         | LQT2 | Not Tolerated | Disease (9)  | Disease (0.94)  | Inherited Arrhythmias Database                        |
| I571L | S5         | LQT2 | Not Tolerated | Disease (9)  | Disease (0.999) | Inherited Arrhythmias Database                        |
| I571V | S5         | LQT2 | Not Tolerated | Disease (7)  | Disease (0.999) | Inherited Arrhythmias Database                        |
| G572C | S5/Pore    | LQT2 | Not Tolerated | Disease (10) | Disease (0.999) | Inherited Arrhythmias Database                        |
| G572D | S5/Pore    | LQT2 | Not Tolerated | Disease (10) | Disease (0.999) | Inherited Arrhythmias Database                        |
| G572R | S5/Pore    | LQT2 | Not Tolerated | Disease (10) | Disease (0.999) | Inherited Arrhythmias Database                        |
| G572S | S5/Pore    | LQT2 | Not Tolerated | Disease (9)  | Disease (0.999) | Inherited Arrhythmias Database                        |
| G572V | S5/Pore    | LQT2 | Not Tolerated | Disease (10) | Disease (0.999) | Kapplinger JD et al. Heart Rhythm 2009;5(9):1297-1303 |
| M574V | S5/Pore    | LQT2 | Tolerated     | Disease (1)  | Benign (0.453)  | Tan HL et al. Circulation 2006;114(20):2096-2103      |
| E575G | S5/Pore    | LQT2 | Not Tolerated | Disease (10) | Disease (0.999) | Inherited Arrhythmias Database                        |
| R582C | S5/Pore    | LQT2 | Not Tolerated | Disease (8)  | Disease (0.684) | Inherited Arrhythmias Database                        |
| R582L | S5/Pore    | LQT2 | Not Tolerated | Disease (6)  | Disease (0.819) | Inherited Arrhythmias Database                        |
| G584R | S5/Pore    | LQT2 | Not Tolerated | Disease (10) | Disease (0.875) | Kapplinger JD et al. Heart Rhythm 2009;5(9):1297-1303 |
| G584S | S5/Pore    | LQT2 | Tolerated     | Disease (8)  | Benign (0.453)  | Inherited Arrhythmias Database                        |
| W585C | S5/Pore    | LQT2 | Not Tolerated | Disease (10) | Disease (1)     | Inherited Arrhythmias Database                        |
| N588D | S5/Pore    | LQT2 | Tolerated     | Disease (7)  | Disease (0.686) | Inherited Arrhythmias Database                        |
| I593K | S5/Pore    | LQT2 | Not Tolerated | Disease (10) | Disease (1)     | Kapplinger JD et al. Heart Rhythm 2009;5(9):1297-1303 |
| I593R | S5/Pore    | LQT2 | Not Tolerated | Disease (9)  | Disease (1)     | Inherited Arrhythmias Database                        |
| I593G | S5/Pore    | LQT2 | Not Tolerated | Disease (9)  | Disease (1)     | Inherited Arrhythmias Database                        |
| G594D | S5/Pore    | LQT2 | Tolerated     | Disease (9)  | Disease (0.917) | Kapplinger JD et al. Heart Rhythm 2009;5(9):1297-1303 |
| P596H | S5/Pore    | LQT2 | Tolerated     | Disease (3)  | Disease (0.529) | Kapplinger JD et al. Heart Rhythm 2009;5(9):1297-1303 |
| P596L | S5/Pore    | LQT2 | Tolerated     | Disease (3)  | Disease (0.543) | Inherited Arrhythmias Database                        |
| P596R | S5/Pore    | LQT2 | Tolerated     | Disease (0)  | Disease (0.694) | Inherited Arrhythmias Database                        |
| Y597C | S5/Pore    | LQT2 | Not Tolerated | Disease (7)  | Disease (0.999) | Kapplinger JD et al. Heart Rhythm 2009;5(9):1297-1303 |
| S599R | S5/Pore    | LQT2 | Tolerated     | Disease (3)  | Benign (0.316)  | Kapplinger JD et al. Heart Rhythm 2009;5(9):1297-1303 |
| G601C | S5/Pore    | LQT2 | Not Tolerated | Disease (7)  | Benign (0.401)  | Kapplinger JD et al. Heart Rhythm 2009;5(9):1297-1303 |
| G601S | S5/Pore    | LQT2 | Tolerated     | Disease (3)  | Benign (0.21)   | Inherited Arrhythmias Database                        |
| G604S | S5/Pore    | LQT2 | Not Tolerated | Disease (4)  | Disease (0.999) | Inherited Arrhythmias Database                        |
| P605L | S5/Pore    | LQT2 | Tolerated     | Disease (4)  | Disease (0.968) | Kapplinger JD et al. Heart Rhythm 2009;5(9):1297-1303 |
| P605S | S5/Pore    | LQT2 | Not Tolerated | Disease (3)  | Disease (0.999) | Kapplinger JD et al. Heart Rhythm 2009;5(9):1297-1303 |
| D609G | pore-helix | LQT2 | Tolerated     | Disease (7)  | Disease (0.999) | Inherited Arrhythmias Database                        |
| D609H | pore-helix | LQT2 | Not Tolerated | Disease (7)  | Disease (0.99)  | Inherited Arrhythmias Database                        |
| D609N | pore-helix | LQT2 | Tolerated     | Disease (5)  | Disease (0.692) | Inherited Arrhythmias Database                        |
| Y611H | pore-helix | LQT2 | Not Tolerated | Disease (10) | Disease (0.999) | Inherited Arrhythmias Database                        |
| V612L | pore-helix | LQT2 | Tolerated     | Disease (6)  | Disease (1)     | Inherited Arrhythmias Database                        |
| T613M | pore-helix | LQT2 | Not Tolerated | Disease (9)  | Disease (0.853) | Inherited Arrhythmias Database                        |
| A614V | pore-helix | LQT2 | Not Tolerated | Disease (9)  | Disease (0.814) | Inherited Arrhythmias Database                        |
| L615F | pore-helix | LQT2 | Not Tolerated | Disease (8)  | Disease (0.999) | Inherited Arrhythmias Database                        |
| L615V | pore-helix | LQT2 | Not Tolerated | Disease (9)  | Disease (0.999) | Inherited Arrhythmias Database                        |
| Y616C | pore-helix | LQT2 | Not Tolerated | Disease (10) | Disease (0.999) | Kapplinger JD et al. Heart Rhythm 2009;5(9):1297-1303 |
| S621N | pore-helix | LQT2 | Not Tolerated | Disease (10) | Disease (0.999) | Inherited Arrhythmias Database                        |
| S621R | pore-helix | LQT2 | Not Tolerated | Disease (10) | Disease (0.956) | Inherited Arrhythmias Database                        |
| L622F | pore-SF    | LQT2 | Not Tolerated | Disease (8)  | Disease (0.999) | Inherited Arrhythmias Database                        |
| T623I | pore-SF    | LQT2 | Not Tolerated | Disease (9)  | Disease (0.999) | Inherited Arrhythmias Database                        |
| V625E | SF         | LQT2 | Not Tolerated | Disease (8)  | Disease (0.999) | Inherited Arrhythmias Database                        |
| G626A | SF         | LQT2 | Not Tolerated | Disease (9)  | Disease (0.999) | Inherited Arrhythmias Database                        |
| G626D | SF         | LQT2 | Not Tolerated | Disease (9)  | Disease (0.999) | Kapplinger JD et al. Heart Rhythm 2009;5(9):1297-1303 |
| G626S | SF         | LQT2 | Not Tolerated | Disease (9)  | Disease (0.999) | Inherited Arrhythmias Database                        |
| G626V | SF         | LQT2 | Not Tolerated | Disease (9)  | Disease (0.999) | Jahr S et al. Human Mutation 2000;15(6):584           |
| F627L | SF         | LQT2 | Not Tolerated | Disease (9)  | Disease (0.999) | Inherited Arrhythmias Database                        |
| G628S | SF         | LQT2 | Not Tolerated | Disease (9)  | Disease (0.999) | Inherited Arrhythmias Database                        |
| G628V | SF         | LQT2 | Not Tolerated | Disease (9)  | Disease (0.953) | Inherited Arrhythmias Database                        |
| N629D | S6/Pore    | LQT2 | Not Tolerated | Disease (6)  | Disease (0.961) | Inherited Arrhythmias Database                        |
| N629I | S6/Pore    | LQT2 | Not Tolerated | Disease (9)  | Disease (0.999) | Kapplinger JD et al. Heart Rhythm 2009;5(9):1297-1303 |
| N629K | S6/Pore    | LQT2 | Not Tolerated | Disease (9)  | Disease (0.91)  | Inherited Arrhythmias Database                        |
| N629S | S6/Pore    | LQT2 | Not Tolerated | Disease (9)  | Disease (0.954) | Inherited Arrhythmias Database                        |

Supplementary Table 1. Kv11.1 missense mutations

|       |          |      |               |              |                 |                                                              |
|-------|----------|------|---------------|--------------|-----------------|--------------------------------------------------------------|
| N629T | S6/Pore  | LQT2 | Not Tolerated | Disease (8)  | Disease (0.999) | Chung SK et al. Heart Rhythm 2007;4(10):1306-1314            |
| V630A | S6/Pore  | LQT2 | Not Tolerated | Disease (9)  | Disease (0.999) | Inherited Arrhythmias Database                               |
| V630L | S6/Pore  | LQT2 | Not Tolerated | Disease (9)  | Disease (0.999) | Inherited Arrhythmias Database                               |
| P632S | S6/Pore  | LQT2 | Not Tolerated | Disease (7)  | Disease (1)     | Inherited Arrhythmias Database                               |
| N633D | S6/Pore  | LQT2 | Tolerated     | Disease (6)  | Disease (0.866) | Inherited Arrhythmias Database                               |
| N633S | S6/Pore  | LQT2 | Not Tolerated | Disease (4)  | Disease (0.859) | Inherited Arrhythmias Database                               |
| T634I | S6/Pore  | LQT2 | Not Tolerated | Disease (9)  | Disease (0.999) | Kapplinger JD et al. Heart Rhythm 2009;5(9):1297-1303        |
| N635D | S6/Pore  | LQT2 | Tolerated     | Neutral (1)  | Benign (0.372)  | Kapplinger JD et al. Heart Rhythm 2009;5(9):1297-1303        |
| N635I | S6/Pore  | LQT2 | Not Tolerated | Disease (7)  | Disease (0.907) | Inherited Arrhythmias Database                               |
| N635K | S6/Pore  | LQT2 | Not Tolerated | Disease (6)  | Benign (0.374)  | Kapplinger JD et al. Heart Rhythm 2009;5(9):1297-1303        |
| E637D | S6/Pore  | LQT2 | Not Tolerated | Disease (9)  | Disease (0.999) | Inherited Arrhythmias Database                               |
| E637G | S6/Pore  | LQT2 | Not Tolerated | Disease (10) | Disease (0.999) | Amoros I et al. Heart Rhythm 2011;8(3):463-470               |
| E637K | S6/Pore  | LQT2 | Not Tolerated | Disease (10) | Disease (0.999) | Inherited Arrhythmias Database                               |
| K638E | S6/Pore  | LQT2 | Not Tolerated | Disease (10) | Disease (0.933) | Inherited Arrhythmias Database                               |
| K638N | S6/Pore  | LQT2 | Not Tolerated | Disease (10) | Disease (0.999) | Kapplinger JD et al. Heart Rhythm 2009;5(9):1297-1303        |
| F640L | S6       | LQT2 | Not Tolerated | Disease (9)  | Disease (0.999) | Inherited Arrhythmias Database                               |
| F640V | S6       | LQT2 | Not Tolerated | Disease (9)  | Disease (0.999) | Inherited Arrhythmias Database                               |
| S641F | S6       | LQT2 | Not Tolerated | Disease (9)  | Disease (0.999) | Inherited Arrhythmias Database                               |
| V644F | S6       | LQT2 | Not Tolerated | Disease (9)  | Disease (0.777) | Inherited Arrhythmias Database                               |
| V644L | S6       | LQT2 | Not Tolerated | Disease (6)  | Disease (1)     | Kapplinger JD et al. Heart Rhythm 2009;5(9):1297-1303        |
| M645I | S6       | LQT2 | Not Tolerated | Disease (9)  | Disease (0.999) | Kapplinger JD et al. Heart Rhythm 2009;5(9):1297-1303        |
| M645L | S6       | LQT2 | Not Tolerated | Disease (9)  | Disease (0.913) | Inherited Arrhythmias Database                               |
| M645V | S6       | LQT2 | Not Tolerated | Disease (9)  | Disease (0.914) | Inherited Arrhythmias Database                               |
| G648S | S6       | LQT2 | Not Tolerated | Disease (9)  | Disease (0.953) | Kapplinger JD et al. Heart Rhythm 2009;5(9):1297-1303        |
| S649L | S6       | LQT2 | Not Tolerated | Disease (9)  | Disease (1)     | Inherited Arrhythmias Database                               |
| F656C | S6       | LQT2 | Not Tolerated | Disease (10) | Disease (1)     | Inherited Arrhythmias Database                               |
| G657R | S6       | LQT2 | Not Tolerated | Disease (10) | Disease (0.92)  | Kapplinger JD et al. Heart Rhythm 2009;5(9):1297-1303        |
| G657S | S6       | LQT2 | Not Tolerated | Disease (9)  | Disease (1)     | Kapplinger JD et al. Heart Rhythm 2009;5(9):1297-1303        |
| S660L | S6       | LQT2 | Not Tolerated | Disease (10) | Disease (1)     | Inherited Arrhythmias Database                               |
| I662T | S6       | LQT2 | Not Tolerated | Disease (9)  | Disease (1)     | Kapplinger JD et al. Heart Rhythm 2009;5(9):1297-1303        |
| L678P | C-linker | LQT2 | Tolerated     | Disease (9)  | Disease (0.565) | Kapplinger JD et al. Heart Rhythm 2009;5(9):1297-1303        |
| H687Y | C-linker | LQT2 | Not Tolerated | Disease (9)  | Disease (0.821) | Kapplinger JD et al. Heart Rhythm 2009;5(9):1297-1303        |
| L693P | C-linker | LQT2 | Not Tolerated | Disease (10) | Disease (0.955) | Kapplinger JD et al. Heart Rhythm 2009;5(9):1297-1303        |
| R696C | C-linker | LQT2 | Not Tolerated | Disease (10) | Disease (1)     | Inherited Arrhythmias Database                               |
| R696P | C-linker | LQT2 | Not Tolerated | Disease (10) | Disease (0.861) | Inherited Arrhythmias Database                               |
| S706C | C-linker | LQT2 | Not Tolerated | Disease (9)  | Disease (1)     | Inherited Arrhythmias Database                               |
| S706F | C-linker | LQT2 | Not Tolerated | Disease (10) | Disease (1)     | Itoh H et al. Circ Arrhythm Electrophysiol 2009;2:511-523    |
| I711V | C-linker | LQT2 | Not Tolerated | Disease (7)  | Disease (0.953) | Kapplinger JD et al. Heart Rhythm 2009;5(9):1297-1303        |
| P721L | C-linker | LQT2 | Not Tolerated | Disease (10) | Disease (1)     | Inherited Arrhythmias Database                               |
| I728F | C-linker | LQT2 | Not Tolerated | Disease (9)  | Disease (0.816) | Kapplinger JD et al. Heart Rhythm 2009;5(9):1297-1303        |
| S735L | C-linker | LQT2 | Tolerated     | Disease (4)  | Disease (0.998) | Inherited Arrhythmias Database                               |
| R744P | C-linker | LQT2 | Not Tolerated | Disease (1)  | Disease (0.668) | Aidery P Biochem Biophys Res Commun 2012;418(4):830-835      |
| G749V | CNBHD    | LQT2 | Not Tolerated | Disease (9)  | Disease (0.999) | Kapplinger JD et al. Heart Rhythm 2009;5(9):1297-1303        |
| R752Q | CNBHD    | SIDS | Not Tolerated | Disease (8)  | Disease (1)     | Inherited Arrhythmias Database                               |
| R752W | CNBHD    | LQT2 | Not Tolerated | Disease (9)  | Disease (1)     | Inherited Arrhythmias Database                               |
| M756V | CNBHD    | SIDS | Tolerated     | Neutral (1)  | Disease (0.766) | Itoh H et al. Circ Arrhythm Electrophysiol 2009;2:511-523    |
| K757N | CNBHD    | LQT2 | Not Tolerated | Disease (8)  | Disease (0.705) | Kapplinger JD et al. Heart Rhythm 2009;5(9):1297-1303        |
| D767Y | CNBHD    | LQT2 | Not Tolerated | Disease (10) | Disease (.954)  | Kapplinger JD et al. Heart Rhythm 2009;5(9):1297-1303        |
| V770A | CNBHD    | LQT2 | Not Tolerated | Disease (8)  | Disease (0.914) | Kapplinger JD et al. Heart Rhythm 2009;5(9):1297-1303        |
| D774Y | CNBHD    | LQT2 | Not Tolerated | Disease (10) | Disease (0.919) | Inherited Arrhythmias Database                               |
| R784W | CNBHD    | LQT2 | Not Tolerated | Disease (9)  | Disease (0.954) | Inherited Arrhythmias Database                               |
| G785V | CNBHD    | LQT2 | Not Tolerated | Disease (6)  | Disease (1)     | Kapplinger JD et al. Heart Rhythm 2009;5(9):1297-1303        |
| E788D | CNBHD    | LQT2 | Not Tolerated | Disease (9)  | Disease (1)     | Inherited Arrhythmias Database                               |
| E788K | CNBHD    | LQT2 | Not Tolerated | Disease (10) | Disease (0.853) | Kapplinger JD et al. Heart Rhythm 2009;5(9):1297-1303        |
| R791W | CNBHD    | LQT2 | Not Tolerated | Disease (8)  | Disease (0.701) | Kapplinger JD et al. Heart Rhythm 2009;5(9):1297-1303        |
| G800W | CNBHD    | LQT2 | Not Tolerated | Disease (9)  | Disease (1)     | Inherited Arrhythmias Database                               |
| F805C | CNBHD    | LQT2 | Not Tolerated | Disease (10) | Disease (1)     | Inherited Arrhythmias Database                               |
| F805S | CNBHD    | LQT2 | Not Tolerated | Disease (10) | Disease (1)     | Inherited Arrhythmias Database                               |
| G806E | CNBHD    | LQT2 | Not Tolerated | Disease (10) | Disease (0.999) | Kapplinger JD et al. Heart Rhythm 2009;5(9):1297-1303        |
| G816V | CNBHD    | LQT2 | Tolerated     | Disease (9)  | Benign (0.096)  | Krishnan Y et al. Pacing Clin Electrophysiol 2012;35(1):3-16 |
| S818L | CNBHD    | LQT2 | Not Tolerated | Disease (9)  | Disease (0.905) | Inherited Arrhythmias Database                               |
| S818P | CNBHD    | LQT2 | Not Tolerated | Disease (10) | Disease (1)     | Inherited Arrhythmias Database                               |
| G820R | CNBHD    | LQT2 | Not Tolerated | Disease (8)  | Disease (0.556) | Inherited Arrhythmias Database                               |
| V822M | CNBHD    | LQT2 | Not Tolerated | Disease (7)  | Disease (0.917) | Inherited Arrhythmias Database                               |
| R823W | CNBHD    | LQT2 | Not Tolerated | Disease (10) | Disease (1)     | Inherited Arrhythmias Database                               |
| R835W | CNBHD    | LQT2 | Not Tolerated | Disease (9)  | Disease (0.959) | Inherited Arrhythmias Database                               |
| D837G | CNBHD    | LQT2 | Tolerated     | Disease (9)  | Disease (0.9)   | Inherited Arrhythmias Database                               |
| D837Y | CNBHD    | LQT2 | Not Tolerated | Disease (9)  | Disease (0.973) | Kapplinger JD et al. Heart Rhythm 2009;5(9):1297-1303        |
| P846S | CNBHD    | LQT2 | Tolerated     | Disease (9)  | Disease (0.881) | Kapplinger JD et al. Heart Rhythm 2009;5(9):1297-1303        |



Supplementary Table 1. Kv11.1 missense mutations

|        |        |      |               |              |                 |                                                           |
|--------|--------|------|---------------|--------------|-----------------|-----------------------------------------------------------|
| N861H  | CNBHD  | LQT2 | Not Tolerated | Disease (10) | Disease (1)     | Inherited Arrhythmias Database                            |
| N861I  | CNBHD  | LQT2 | Not Tolerated | Disease (10) | Disease (1)     | Inherited Arrhythmias Database                            |
| G873S  | C-Term | SNP  | Tolerated     | Neutral (4)  | Benign (0)      | Koo SH et al. Br J Clin Pharmacol 2006;61(3):301-308      |
| T875M  | C-Term | SNP  | Tolerated     | Neutral (6)  | Benign (0.092)  | Inherited Arrhythmias Database                            |
| R885C  | C-Term | SIDS | Not Tolerated | Disease (1)  | Disease (0.719) | Inherited Arrhythmias Database                            |
| R887H  | C-Term | SNP  | Tolerated     | Disease (4)  | Benign (0.354)  | Inherited Arrhythmias Database                            |
| R894C  | C-Term | LQT2 | Not Tolerated | Disease (5)  | Disease (0.681) | Kapplinger JD et al. Heart Rhythm 2009;5(9):1297-1303     |
| R894L  | C-Term | LQT2 | Tolerated     | Disease (2)  | Disease (0.575) | Kapplinger JD et al. Heart Rhythm 2009;5(9):1297-1303     |
| T895M  | C-Term | SIDS | Tolerated     | Neutral (3)  | Benign (0)      | Otagiri T et al. Pediatr Res 2008;64(5):482-487           |
| K897T  | C-Term | SNP  | Tolerated     | Neutral (0)  | Benign (0.426)  | Inherited Arrhythmias Database                            |
| G903R  | C-Term | LQT2 | Tolerated     | Disease (3)  | Disease (0.63)  | Kapplinger JD et al. Heart Rhythm 2009;5(9):1297-1303     |
| S906L  | C-Term | LQT2 | Tolerated     | Neutral (0)  | Disease (0.636) | Kapplinger JD et al. Heart Rhythm 2009;5(9):1297-1303     |
| P910L  | C-Term | SNP  | Tolerated     | Neutral (3)  | Benign (0.236)  | Inherited Arrhythmias Database                            |
| A913V  | C-Term | LQT2 | Tolerated     | Neutral (7)  | Disease (0.895) | Inherited Arrhythmias Database                            |
| A915V  | C-Term | SNP  | Tolerated     | Neutral (7)  | Benign (0.079)  | Inherited Arrhythmias Database                            |
| P917L  | C-Term | SNP  | Tolerated     | Neutral (2)  | Benign (0.317)  | Inherited Arrhythmias Database                            |
| R920Q  | C-Term | LQT2 | Tolerated     | Disease (2)  | Disease (0.839) | Kapplinger JD et al. Heart Rhythm 2009;5(9):1297-1303     |
| R920W  | C-Term | LQT2 | Tolerated     | Disease (7)  | Disease (0.739) | Kapplinger JD et al. Heart Rhythm 2009;5(9):1297-1303     |
| R922Q  | C-Term | LQT2 | Tolerated     | Neutral (2)  | Disease (0.836) | Kapplinger JD et al. Heart Rhythm 2009;5(9):1297-1303     |
| R922W  | C-Term | LQT2 | Tolerated     | Disease (0)  | Disease (0.739) | Inherited Arrhythmias Database                            |
| G924A  | C-Term | LQT2 | Tolerated     | Neutral (3)  | Disease (0.508) | Kapplinger JD et al. Heart Rhythm 2009;5(9):1297-1303     |
| G924E  | C-Term | LQT2 | Tolerated     | Neutral (2)  | Disease (1)     | Kapplinger JD et al. Heart Rhythm 2009;5(9):1297-1303     |
| S937N  | C-Term | LQT2 | Tolerated     | Neutral (7)  | Benign (0.366)  | Kapplinger JD et al. Heart Rhythm 2009;5(9):1297-1303     |
| R948C  | C-Term | LQT2 | Tolerated     | Neutral (0)  | Disease (0.892) | Inherited Arrhythmias Database                            |
| R954C  | C-Term | SIDS | Tolerated     | Disease (3)  | Disease (1)     | Inherited Arrhythmias Database                            |
| L955V  | C-Term | LQT2 | Tolerated     | Neutral (7)  | Disease (0.892) | Biliczki P et al. Heart Rhythm 2008;5(8):1159-1167        |
| S960N  | C-Term | LQT2 | Tolerated     | Neutral (2)  | Disease (0.929) | Inherited Arrhythmias Database                            |
| P963T  | C-Term | LQT2 | Tolerated     | Neutral (3)  | Benign (0.352)  | Kapplinger JD et al. Heart Rhythm 2009;5(9):1297-1303     |
| G965R  | C-Term | SNP  | Tolerated     | Neutral (3)  | Benign (0.044)  | Koo SH et al. Br J Clin Pharmacol 2006;61(3):301-308      |
| P967L  | C-Term | SNP  | Tolerated     | Neutral (3)  | Benign (0.101)  | Inherited Arrhythmias Database                            |
| P968L  | C-Term | LQT2 | Tolerated     | Neutral (3)  | Benign (0.181)  | Inherited Arrhythmias Database                            |
| N996I  | C-Term | LQT2 | Tolerated     | Disease (8)  | Disease (0.882) | Tan HL et al. Circulation 2006;114(20):2096-2103          |
| R1005Q | (RXR)  | LQT2 | Tolerated     | Disease (1)  | Disease (0.715) | Kapplinger JD et al. Heart Rhythm 2009;5(9):1297-1303     |
| R1007H | (RXR)  | LQT2 | Tolerated     | Disease (1)  | Disease (0.777) | Kapplinger JD et al. Heart Rhythm 2009;5(9):1297-1303     |
| R1033W | C-Term | LQT2 | Tolerated     | Disease (1)  | Disease (0.598) | Kapplinger JD et al. Heart Rhythm 2009;5(9):1297-1303     |
| R1035W | CCD    | SNP  | Tolerated     | Neutral (2)  | Benign (0.403)  | Inherited Arrhythmias Database                            |
| G1036D | CCD    | LQT2 | Tolerated     | Neutral (3)  | Disease (0.605) | Biliczki P et al. Heart Rhythm 2008;5(8):1159-1167        |
| V1038M | CCD    | LQT2 | Tolerated     | Neutral (3)  | Benign (0.114)  | Kapplinger JD et al. Heart Rhythm 2009;5(9):1297-1303     |
| S1040G | CCD    | SIDS | Tolerated     | Neutral (7)  | Disease (0.583) | Inherited Arrhythmias Database                            |
| R1047L | CCD    | SNP  | Tolerated     | Disease (1)  | Disease (0.676) | Inherited Arrhythmias Database                            |
| L1049P | CCD    | LQT2 | Not Tolerated | Disease (6)  | Benign (0.051)  | Kapplinger JD et al. Heart Rhythm 2009;5(9):1297-1303     |
| R1055Q | CCD    | SNP  | Tolerated     | Neutral (1)  | Benign (0.275)  | Inherited Arrhythmias Database                            |
| A1058E | CCD    | SNP  | Tolerated     | Disease (3)  | Benign (0)      | Inherited Arrhythmias Database                            |
| L1066V | CCD    | LQT2 | Not Tolerated | Disease (2)  | Benign (0.463)  | Kapplinger JD et al. Heart Rhythm 2009;5(9):1297-1303     |
| Q1068R | CCD    | SNP  | Tolerated     | Disease (1)  | Benign (0.091)  | Inherited Arrhythmias Database                            |
| P1075L | C-Term | LQT2 | Tolerated     | Disease (4)  | Disease (0.82)  | Chung SK et al. Heart Rhythm 2007;4(10):1306-1314         |
| Y1078C | C-Term | LQT2 | Tolerated     | Disease (4)  | Benign (0.168)  | Kapplinger JD et al. Heart Rhythm 2009;5(9):1297-1303     |
| P1093L | C-Term | LQT2 | Tolerated     | Neutral (2)  | Benign (0.46)   | Kapplinger JD et al. Heart Rhythm 2009;5(9):1297-1303     |
| L1108V | C-Term | SNP  | Tolerated     | Neutral (6)  | Benign (0.252)  | Inherited Arrhythmias Database                            |
| M1115V | C-Term | LQT2 | Tolerated     | Neutral (6)  | Disease (0.678) | Kapplinger JD et al. Heart Rhythm 2009;5(9):1297-1303     |
| A1116V | C-Term | LQT2 | Tolerated     | Neutral (6)  | Benign (0.259)  | Kapplinger JD et al. Heart Rhythm 2009;5(9):1297-1303     |
| H1153Y | C-Term | LQT2 | Tolerated     | Neutral (5)  | Benign (0.215)  | Inherited Arrhythmias Database                            |
| G1154S | C-Term | SNP  | Tolerated     | Neutral (4)  | Benign (0.133)  | Inherited Arrhythmias Database                            |
| P1157L | C-Term | SIDS | Not Tolerated | Neutral (4)  | Disease (0.695) | Tester DJ and Ackerman MJ. Cardiovasc Res 2005;67:388-396 |

Numbers in parentheses (1-10 for SNP&Go and 0-1 for KvSNP) are a reliability index with larger numbers more reliable. References indicate the literature source identifying the missense variant. Abbreviations: SNP (non synonymous single nucleotide polymorphism), SIDS (sudden infant death syndrome) LQT2 (type 2 Long QT Syndrome).

Supplementary Table 2. Properties of Kv11.1 EAGD mutations

| LQT2  | Class | 27  | E4  | WT  | Reference                                                                |
|-------|-------|-----|-----|-----|--------------------------------------------------------------------------|
| D16A  | 3     |     |     |     | This study                                                               |
| R20G  | n/a   |     |     |     | This study                                                               |
| S26I  | 2     | +   | +   | +   | This study                                                               |
| K28E  | 2     | +   | +   | +   | This study                                                               |
| F29L  | 2     | +   | +   | +   | This study                                                               |
| I30T  | 2     | +   | +   | +   | This Study                                                               |
| I31S  | 2     | -   | -   | +   | Anderson et al. Circulation 2006;113(3):365-373                          |
| A32T  | 2     | +   | +   | +   | This study                                                               |
| N33T  | 3     |     |     |     | This study and Gianulis and Trudeau J Biol Chem 2011;286(25):22160-22169 |
| V41F  | 2     | -   | -   | +   | This study                                                               |
| I42N  | 2     | +   | -   | +   | This study                                                               |
| Y43C  | 2     | +   | -   | +   | This study                                                               |
| C44F  | 2     | -   | -   | +   | This study                                                               |
| N45Y  | 2     | -   | -   | +   | This study                                                               |
| G47V  | 2     | +   | -   | +   | This study                                                               |
| C49Y  | 2     | +   | -   | +   | This study                                                               |
| G53D  | 2     | +   | -   | +   | This study                                                               |
| G53R  | 2     | +   | +   | +   | This study                                                               |
| Y54H  | 2     | +   | +   | +   | This study                                                               |
| S55L  | 2     | +   | -   | +   | This study                                                               |
| R56Q  | 3     |     |     |     | This study and Gianulis and Trudeau J Biol Chem 2011;286(25):22160-22169 |
| A57P  | n/a   |     |     |     | This study                                                               |
| E58A  | 2     | +   | +   | +   | This study                                                               |
| E58D  | 2     |     |     |     | This study                                                               |
| E58G  | 2     | +   | -   | +   | This study                                                               |
| E58K  | 2     | +   | +   | +   | This study                                                               |
| C64W  | 2     | +   | -   | +   | This study                                                               |
| C64Y  | 2     | +   | +   | +   | This study                                                               |
| T65P  | 2     | +   | +   | +   | Paulussen A et al. J Biol Chem 2002;277(50):48610-48616                  |
| C66G  | 2     | +   | -   | +   | This study                                                               |
| F68L  | 2     | +   | -   | +   | This study                                                               |
| H70N  | 2     | +   | +   | +   | This study                                                               |
| H70R  | 2     | +   | +   | +   | This study                                                               |
| G71R  | 2     | -   | -   | +   | This study                                                               |
| P72L  | 2     | +   | +   | +   | This study                                                               |
| P72Q  | 2     | +   | +   | +   | This study                                                               |
| T74M  | 2     | -   | -   | +   | This study                                                               |
| T74P  | 2     | -   | -   | +   | This study                                                               |
| T74R  | 2     | -   | -   | +   | This study                                                               |
| A78P  | 2     | +   | +   | +   | This study                                                               |
| A80P  | 2     | n/a | n/a | n/a | Grilo LS et al. Ann Noninvasive Electrocardiol 2011;16(2):213-218        |
| A85V  | 2     | +   | +   | +   | This study                                                               |
| L86P  | 2     | +   | -   | +   | This study                                                               |
| L86R  | 2     | +   | -   | +   | This study                                                               |
| L87P  | 2     | +   | -   | +   | This study                                                               |
| V94G  | 2     | +   | -   | +   | This study                                                               |
| I96T  | 2     | +   | +   | +   | This study                                                               |
| I96V  | n/a   |     |     |     |                                                                          |
| F98S  | 2     | +   | -   | +   | This study                                                               |
| Y99S  | 2     | +   | +   | +   | This study                                                               |
| R100G | 2     | +   | +   | +   | This study                                                               |
| R100Q | 2     | +   | -   | +   | This study                                                               |
| R100W | 2     | +   | -   | +   | This study                                                               |
| K101E | 2     | -   | -   | +   | This study                                                               |
| D102A | n/a   |     |     |     |                                                                          |
| F106L | 2     | +   | +   | +   | This study                                                               |
| F106Y | 2     | +   | +   | +   | This study                                                               |
| C108R | 2     | -   | -   | +   | This study                                                               |
| P114S | 2     | +   | +   | +   | This study                                                               |
| V115M | n/a   |     |     |     | This study                                                               |
| M124R | 2     | +   | +   | +   | This study                                                               |
| M124T | n/a   |     |     |     | This study & Hayashi et al. Clinical Science 2004;107:175-182            |
| F125C | n/a   |     |     |     | This study                                                               |
| E130K | n/a   |     |     |     | This study                                                               |

Class column indicates loss-of-function category where type 2 and 3 mutations have abnormal trafficking and gating, respectively. Mutations labeled n/a (not available) were not studied (I96V, D102A), traffic normally but not functionally characterized (A57P), or traffic normally but do not exhibit loss-of-function characteristics (R20G, E58D, V115M, M124T, F125C, E130K). (+) and (-) indicates an increase or not in the 155kD band on immunoblot for type 2 homomeric channels when cultured at 27°C, in E4031 or with WT. In addition to the results reported here (This study), results reported elsewhere are also listed and cited in the References column.



Supplementary Table 3. Properties of Kv11.1 C-linker/CNBHD mutations

| LQT2  | Class | 27  | E4  | WT | Reference                                                             |
|-------|-------|-----|-----|----|-----------------------------------------------------------------------|
| L678P | n/a   |     |     |    |                                                                       |
| H687Y | 2     | +   | +   | +  | This study                                                            |
| L693P | n/a   |     |     |    |                                                                       |
| R696C | 2     | +   | -   | +  | This study                                                            |
| R696P | 2     | -   | -   | +  | This study                                                            |
| S706C | n/a   |     |     |    | This study                                                            |
| S706F | 2     | n/a | n/a | +  | Itoh H et al. <i>Circ Arrhythm Electrophysiol</i> 2009;2:511-523      |
| I711V | n/a   |     |     |    | This study                                                            |
| P721L | 2     | -   | -   | +  | This study                                                            |
| I728F | n/a   |     |     |    |                                                                       |
| S735L | 2     | -   | -   | +  | This study                                                            |
| R744P | 2     | n/a | n/a | +  | Aidery P et al. <i>Biochem Biophys Res Commun</i> 2012;418(4):830-835 |
| G749V | 2     | +   | -   | +  | This study                                                            |
| R752Q | 2     | +   | +   | +  | This study                                                            |
| R752W | 2     | +   | -   | +  | Anderson CL et al. <i>Circulation</i> 2006;13(3):365-373              |
| M756V | 2     | n/a | n/a | +  | Itoh H et al. <i>Circ Arrhythm Electrophysiol</i> 2009;2:511-523      |
| K757N | 2     | +   | +   | +  | This study                                                            |
| D767Y | 3     |     |     |    | This study                                                            |
| V770A | 2     | +   | -   | +  | This study                                                            |
| D774Y | 2     | -   | -   | +  | This study                                                            |
| R784W | 2     | +   | +   | +  | This study                                                            |
| G785V | 2     | -   | -   | +  | This study                                                            |
| E788D | 2     | +   | -   | +  | This study                                                            |
| E788K | 2     | +   | -   | +  | This study                                                            |
| R791W | 3     |     |     |    | This study                                                            |
| G800W | 2     | +   | -   | +  | This study                                                            |
| F805C | 2     | +   | -   | +  | Anderson CL et al. <i>Circulation</i> 2006;13(3):365-373              |
| F805S | 2     | -   | -   | +  | This study                                                            |
| G806E | 2     | -   | -   | +  | This study                                                            |
| G816V | 2     | +   | n/a | +  | Krishnan Y et al. <i>Pacing Clin Electrophysiol</i> 2012;35(1):3-16   |
| S818L | 2     | -   | -   | +  | Anderson CL et al. <i>Circulation</i> 2006;13(3):365-373              |
| S818P | 2     | -   | -   | +  | This study                                                            |
| G820R | 2     | +   | +   | +  | This study                                                            |
| V822M | 2     | -   | -   | +  | Anderson CL et al. <i>Circulation</i> 2006;13(3):365-373              |
| R823W | 2     | -   | -   | +  | Anderson CL et al. <i>Circulation</i> 2006;13(3):365-373              |
| R835W | 3     |     |     |    | This study                                                            |
| D837G | 2     | +   | -   | +  | This study                                                            |
| D837Y | 2     | -   | -   | +  | This study                                                            |
| P846S | 2     | +   | -   | +  | This study                                                            |
| N861H | 2     | +   | -   | +  | This study                                                            |
| N861I | 2     | +   | -   | +  | This study                                                            |

Class column indicates loss-of-function category where type 2 and 3 mutations have abnormal trafficking and gating, respectively. Mutations labeled n/a (not available) were not studied (L678P, L693P, I728F) or traffic normally but do not exhibit loss-of-function characteristics (S706C). (+) and (-) indicates an increase or not in the 155kD band on immunoblot for type 2 homomeric channels when cultured at 27°C, in E4031 or with WT. In addition to the results reported here (This study), results reported elsewhere are also listed and cited in the References column.

Supplementary Table 4. Properties of Kv11.1 pore mutations

| LQT2  | Class | 27  | E4  | WT  | Reference                                                                              |
|-------|-------|-----|-----|-----|----------------------------------------------------------------------------------------|
| L552S | 2     | +   | +   | +   | This study                                                                             |
| A558E | 2     | -   | -   | -   | This study                                                                             |
| A558P | 2     | -   | -   | -   | This study                                                                             |
| L559H | 2     | -   | -   | -   | This study                                                                             |
| A561P | 2     | -   | -   | -   | This study                                                                             |
| A561T | 2     | -   | -   | n/a | Anderson CL et al. Circulation 2006;13(3):365-373                                      |
| A561V | 2     | -   | -   | +   | Anderson CL et al. Circulation 2006;13(3):365-373                                      |
| H562P | 2     | -   | -   | +   | Anderson CL et al. Circulation 2006;13(3):365-373                                      |
| H562R | 2     | -   | -   | +   | This study                                                                             |
| L564P | 2     | -   | -   | -   | This study                                                                             |
| A565T | 2     | -   | -   | -   | This study                                                                             |
| C566S | 2     | -   | -   | +   | This study                                                                             |
| W568C | 2     | -   | -   | -   | This study                                                                             |
| W568R | 2     | -   | -   | +   | This study                                                                             |
| Y569H | 2     | -   | -   | -   | This study                                                                             |
| I571L | 2     | +   | +   | +   | Anderson CL et al. Circulation 2006;13(3):365-373                                      |
| I571V | 2     | +   | +   | +   | This study                                                                             |
| G572C | 2     | -   | -   | -   | This study                                                                             |
| G572D | 2     | -   | -   | -   | This study                                                                             |
| G572R | 2     | -   | -   | -   | This study                                                                             |
| G572S | 2     | -   | +   | -   | Zhao JT et al. J Cardiovasc Electrophysiol 2009;20(8):923-930 & Anderson CL et al 2006 |
| G572V | 2     | -   | -   | +   | This study                                                                             |
| M574V | n/a   |     |     |     |                                                                                        |
| E575G | 2     | +   | +   | +   | This study                                                                             |
| R582C | 2     | +   | n/a | n/a | Fougere RR et al. Heart Rhythm 2011;8(8):1273-1280 & This study (not shown)            |
| R582L | 2     | +   | +   | +   | This study                                                                             |
| G584R | n/a   |     |     |     |                                                                                        |
| G584S | 3     |     |     |     | Zhao JT et al. J Cardiovasc Electrophysiol 2009;20(8):923-930                          |
| W585C | 2     | -   | -   | -   | This study                                                                             |
| N588D | 2     | +   | +   | +   | This study                                                                             |
| I593G | 2     | -   | -   | -   | This study                                                                             |
| I593K | 2     | -   | -   | -   | This study                                                                             |
| I593R | 2     | +   | +   | -   | Anderson CL et al. Circulation 2006;13(3):365-373                                      |
| G594D | 2     | -   | +   | -   | This study                                                                             |
| P596H | 2     | -   | +   | -   | This study                                                                             |
| P596L | 2     | +   | +   | -   | This study                                                                             |
| P596R | 2     | +   | +   | -   | Anderson CL et al. Circulation 2006;13(3):365-373                                      |
| Y597C | 2     | -   | +   | -   | This study                                                                             |
| S599R | 2     | +   | +   | +   | This study                                                                             |
| G601C | 2     | +   | +   | +   | This study                                                                             |
| G601S | 2     | +   | +   | +   | Anderson CL et al. Circulation 2006;13(3):365-373                                      |
| G604S | 2     | -   | -   | -   | This study                                                                             |
| P605L | 2     | -   | -   | -   | This study                                                                             |
| P605S | 2     | -   | -   | -   | This study                                                                             |
| D609G | 2     | -   | -   | -   | This study                                                                             |
| D609H | 2     | -   | -   | -   | This study                                                                             |
| D609N | 2     | -   | -   | -   | This study                                                                             |
| Y611H | 2     | -   | -   | -   | Anderson CL et al. Circulation 2006;13(3):365-373                                      |
| V612L | 2     | -   | +   | +   | Anderson CL et al. Circulation 2006;13(3):365-373                                      |
| T613M | 2     | -   | -   | -   | This study                                                                             |
| A614V | 2     | -   | -   | -   | Anderson CL et al. Circulation 2006;13(3):365-373                                      |
| L615F | 2     | -   | +   | +   | This study                                                                             |
| L615V | 2     | n/a | n/a | +   | Fu-De H et al. Circulation 2001;104:1071-1075                                          |
| Y616C | 4     |     |     |     | This study                                                                             |
| S621N | 2     | -   | -   | -   | This study                                                                             |
| S621R | 2     | -   | -   | -   | This study                                                                             |
| L622F | n/a   |     |     | -   |                                                                                        |
| T623I | 2     | +   | +   | +   | Anderson CL et al. Circulation 2006;13(3):365-373                                      |
| V625E | 2     | -   | -   | -   | This study                                                                             |

Supplementary Table 4. Properties of Kv11.1 pore mutations

|       |     |     |     |     |                                                                |
|-------|-----|-----|-----|-----|----------------------------------------------------------------|
| G626A | 4*  |     |     |     | This study                                                     |
| G626D | 2   | -   | -   | -   | This study                                                     |
| G626S | 2   | -   | +   | n/a | This study                                                     |
| G626V | 2   | -   | -   | +   | This study                                                     |
| F627L | 2   | +   | +   | n/a | This study                                                     |
| G628S | 4   |     |     |     | Zhou et al. J Biol Chem 1998;273(33):21061-21066               |
| G628V | 2   | -   | -   | n/a | This study                                                     |
| N629D | 2   | +   | +   | -   | Anderson CL et al. Circulation 2006;13(3):365-373              |
| N629I | 2   | -   | -   | -   | This study                                                     |
| N629K | 2   | -   | -   | -   | This study                                                     |
| N629S | 2   | +   | +   | -   | Anderson CL et al. Circulation 2006;13(3):365-373              |
| N629T | n/a |     |     |     |                                                                |
| V630A | 2   | +   | +   | -   | Anderson CL et al. Circulation 2006;13(3):365-373              |
| V630L | 2   | +   | +   | +   | Anderson CL et al. Circulation 2006;13(3):365-373              |
| P632S | 2   | -   | -   | -   | This study                                                     |
| N633D | 2   | n/a | n/a | +   | Hsueh CH et al. Biochem Biophys Res Commun 2008;373(4):572-578 |
| N633S | 2   | +   | +   | n/a | This study                                                     |
| T634I | 2   | -   | -   | -   | This study                                                     |
| N635D | 2   | -   | +   | -   | This study                                                     |
| N635I | 2   | +   | +   | +   | This study                                                     |
| N635K | n/a |     |     |     |                                                                |
| E637D | 2   | -   | -   | -   | This study                                                     |
| E637G | 2   | -   | -   | -   | This study                                                     |
| E637K | 2   | -   | -   | n/a | This study                                                     |
| K638E | 2   | -   | -   | n/a | This study                                                     |
| K638N | 2   | -   | -   | -   | This study                                                     |
| F640L | 2   | -   | -   | -   | This study                                                     |
| F640V | 2   | -   | +   | -   | Anderson CL et al. Circulation 2006;13(3):365-373              |
| S641F | 2   | -   | +   | -   | This study                                                     |
| V644F | 2   | -   | -   | -   | This study                                                     |
| V644L | 3   |     |     |     | This study                                                     |
| M645I | n/a |     |     |     | This study                                                     |
| M645L | n/a |     |     |     | This study                                                     |
| M645V | n/a |     |     |     | This study                                                     |
| G648S | n/a |     |     |     | This study                                                     |
| S649L | 4   |     |     |     | This study                                                     |
| F656C | n/a | n/a | n/a | n/a | This study                                                     |
| G657R | 4   |     |     |     | This study                                                     |
| G657S | n/a |     |     |     |                                                                |
| S660L | n/a | +   | +   | +   | This study                                                     |
| I662T | n/a |     |     |     | This study                                                     |

Class column indicates loss-of-function category where type 2, 3 and 4 mutations have abnormal trafficking, gating, and loss of conduction, respectively. Mutations labeled not available (n/a) were not studied (M574V, G584R, L622F, N629T, N635K, G657S), traffic normally but were not functionally characterized (M645I, M645L, M645V, G648S, S660L, F656C), or traffic normally but do not exhibit a loss-of-function phenotype (I662T). (+) and (-) indicates an increase or not in the 155kD band on immunoblot for type 2 homomeric channels when cultured at 27°C, in E4031 or with WT. In addition to the results reported here (This study), results reported elsewhere are also listed and cited in the References column.

Supplementary Table 5. Membrane insertion efficiency

| LQT2                | TMD       | $\Delta G$    | $\Delta\Delta G$ |
|---------------------|-----------|---------------|------------------|
| <b>WT (403-427)</b> | <b>S1</b> | <b>0.591</b>  |                  |
| W410S               | S1        | 1.204         | 0.613            |
| L413P               | S1        | 1.677         | 1.086            |
| Y420C               | S1        | 0.34          | -0.251           |
| T421M               | S1        | 0.314         | -0.277           |
| A422T               | S1        | 0.785         | 0.194            |
|                     |           |               |                  |
| <b>WT (452-474)</b> | <b>S1</b> | <b>1.539</b>  |                  |
| D456Y               | S2        | 0.231         | -1.308           |
| D460Y               | S2        | 0.37          | -1.169           |
| F463L               | S2        | 1.348         | -0.191           |
| D466Y               | S2        | 0.253         | -1.286           |
| N470D               | S2        | 1.588         | 0.49             |
|                     |           |               |                  |
| <b>WT (493-514)</b> | <b>S3</b> | <b>0.819</b>  |                  |
| Y493C               | S3        | 0.922         | 0.103            |
| Y493S               | S3        | 1.293         | 0.474            |
| D501N               | S3        | 0.206         | -0.613           |
| D501H               | S3        | 0.345         | -0.474           |
|                     |           |               |                  |
| <b>WT (522-536)</b> | <b>S4</b> | <b>4.73</b>   |                  |
| K525N               | S4        | 4.732         | 0.002            |
| R528P               | S4        | 4.162         | -0.568           |
| R531Q               | S4        | 4.802         | 0.072            |
| R531W               | S4        | 3.593         | -1.137           |
| R534C               | S4        | 4.558         | -0.172           |
| R534L               | S4        | 2.629         | -2.101           |
|                     |           |               |                  |
| <b>WT (551-571)</b> | <b>S5</b> | <b>-1.539</b> |                  |
| L552S               | S5        | -0.684        | 0.855            |
| A558E               | S5        | -0.036        | 1.503            |
| A558P               | S5        | -0.434        | 1.105            |
| L559H               | S5        | 0.345         | 1.884            |
| A561P               | S5        | -0.567        | 0.972            |
| A561T               | S5        | -1.146        | 0.393            |
| A561V               | S5        | -1.887        | -0.348           |
| H562P               | S5        | -1.684        | -0.145           |
| H562R               | S5        | -1.043        | 0.496            |
| L564P               | S5        | -0.436        | 1.103            |
| A565T               | S5        | -1.245        | 0.294            |
| C566S               | S5        | -0.796        | 0.743            |
| W568R               | S5        | -0.976        | 0.563            |
| W568C               | S5        | -1.176        | 0.363            |
| Y569H               | S5        | -0.284        | 1.255            |
| I571L               | S5        | -1.719        | -0.18            |
| I571V               | S5        | -1.462        | 0.077            |
|                     |           |               |                  |
| <b>WT(639-666)</b>  | <b>S6</b> | <b>0.575</b>  |                  |
| F640V               | S6        | 0.784         | 0.209            |
| F640L               | S6        | 0.493         | -0.082           |
| S641F               | S6        | 0.004         | -0.571           |
| V644L               | S6        | 0.293         | -0.282           |
| V644F               | S6        | 0.388         | -0.187           |
| M645I               | S6        | 0.288         | -0.287           |
| M645L               | S6        | 0.183         | -0.392           |
| M645V               | S6        | 0.56          | -0.015           |
| G648S               | S6        | 0.732         | 0.157            |
| S649L               | S6        | -0.557        | -1.132           |
| F656C               | S6        | 0.843         | 0.268            |
| G657R               | S6        | 1.287         | 0.712            |
| G657S               | S6        | 0.811         | 0.236            |
| S660L               | S6        | -0.539        | -1.114           |
| I662T               | S6        | 0.847         | 0.272            |

Differences between  $\Delta G$  values calculated for each TM segment (1-6) were compared to WT ( $\Delta\Delta G$ ). Positive  $\Delta\Delta G$  values indicate decreased TMD insertion efficiency and negative  $\Delta\Delta G$  values indicate increased TMD insertion efficiency.

Supplementary Table 6. Pathogenicity predictions for Kv11.1 mutations

| Domain               | SIFT         | SNP&Go       | KvSNP        |
|----------------------|--------------|--------------|--------------|
| PASD (LQT2)          | 46/63 (73%)  | 63/63 (100%) | 50/63 (79%)  |
| N-linker (LQT2)      | 6/25 (24%)   | 20/25 (80%)  | 20/25 (80%)  |
| N-linker (SNP)       | 3/12 (25%)   | 9/12 (75%)   | 2/12 (17%)   |
| VSD (LQT2)           | 31/36 (86%)  | 35/36 (97%)  | 31/36 (86%)  |
| Pore (LQT2)          | 85/100 (85%) | 99/100 (99%) | 93/100 (93%) |
| C-linker/CNBD (LQT2) | 33/39 (85%)  | 38/39 (97%)  | 38/39 (97%)  |
| C-term (LQT2)        | 7/38 (18%)   | 18/38 (47%)  | 26/38 (68%)  |
| C-term (SNP)         | 0/16 (0%)    | 4/16 (25%)   | 1/16 (6%)    |

| Total                 | Total         | Total         | Total         |
|-----------------------|---------------|---------------|---------------|
| LQT2 (structural)     | 110/138 (80%) | 136/138 (99%) | 119/138 (86%) |
| LQT2 (non structural) | 13/63 (21%)   | 38/63 (60%)   | 46/63 (73%)   |
| SNP                   | 3/28 (11%)    | 13/28 (46%)   | 3/28 (11%)    |

Fraction of mutations and SNPs predicted to be damaging are tabulated by domain (top). Total number of mutations predicted to be damaging in structural domains (PASD, VSD, pore, C-linker/CNBD) versus nonstructural domains (N-linker and C-term) and total SNPs (bottom). Abbreviations: (VSD) voltage sensor domain, (LQT2) Long QT Syndrome type 2, (SNP) non synonymous single nucleotide polymorphism.

Supplementary Table 7. Bioinformatic tools

| Tool                 | Calculation              | Website                                                                                                                   | Reference                                                            |
|----------------------|--------------------------|---------------------------------------------------------------------------------------------------------------------------|----------------------------------------------------------------------|
| Swiss-Model          | CNBD model               | <a href="http://swissmodel.expasy.org">http://swissmodel.expasy.org</a>                                                   | Arnold K et al. <i>Bioinformatics</i> 2006;22:195-201                |
| Molprobrity          | CNBD model evaluation    | <a href="http://molprobrity.biochem.duke.edu">http://molprobrity.biochem.duke.edu</a>                                     | Davis IW et al. <i>Nucleic Acids Res</i> 2007;35:375-383             |
| UCSF Chimera         | modeling                 | <a href="http://www.cgl.ucsf.edu/chimera">http://www.cgl.ucsf.edu/chimera</a>                                             | Pettersen EF et al. <i>J Comput Chem</i> 2004;25(13):1605-1612       |
| YASARA               | modeling                 | <a href="http://yasara.org">http://yasara.org</a>                                                                         | Van Durme J et al. <i>Bioinformatics</i> 2011;27(12):1711-1712       |
| Pymol                | modeling                 | <a href="http://www.pymol.org">http://www.pymol.org</a>                                                                   | PyMOL Molecular Graphics System, Version 1.2r3pre, Schrödinger, LLC  |
| $\Delta$ G predictor | TM insertion efficiency  | <a href="http://dgpred.cbr.su.se">http://dgpred.cbr.su.se</a>                                                             | Hessa T et al. <i>Nature</i> 2007;450(7172):1026-1030                |
| Paircoil2            | Coiled coil prediction   | <a href="http://paircoil2.csail.mit.edu">http://paircoil2.csail.mit.edu</a>                                               | McDonnell AV et al. <i>Bioinformatics</i> 2006;22(3):356-358         |
| SIFT                 | mutant damage prediction | <a href="http://sift.jcvi.org">http://sift.jcvi.org</a>                                                                   | Ng PC and Henikoff S. <i>Nucleic Acids Res</i> 2003;31(13):3812-3814 |
| SNP&GO               | mutant damage prediction | <a href="http://snps-and-go.biocomp.umbi.it/snps-and-go">http://snps-and-go.biocomp.umbi.it/snps-and-go</a>               | Calabrese R et al. <i>Hum Mutat</i> 2009;30:1237-1244                |
| KvSNP                | mutant damage prediction | <a href="http://www.bioinformatics.leeds.ac.uk/KvDB/KvSNP.html">http://www.bioinformatics.leeds.ac.uk/KvDB/KvSNP.html</a> | Stead LF et al. <i>Bioinformatics</i> 2011;27(16):2181-2186          |

Tools used in this study with web and literature sources cited.
